# Supplementary material for: Systemic lupus erythematosus: molecular cloning and analysis of recombinant monoclonal kappa light chain NGTA1-Me-pro with two metalloprotease active centers
Source: Royal Society of Chemistry journal article supplement (doi:10.1039/c6mb00573j), 2016-10-11
Supplement: c6mb00573j1.pdf [file c6mb00573j1.pdf]

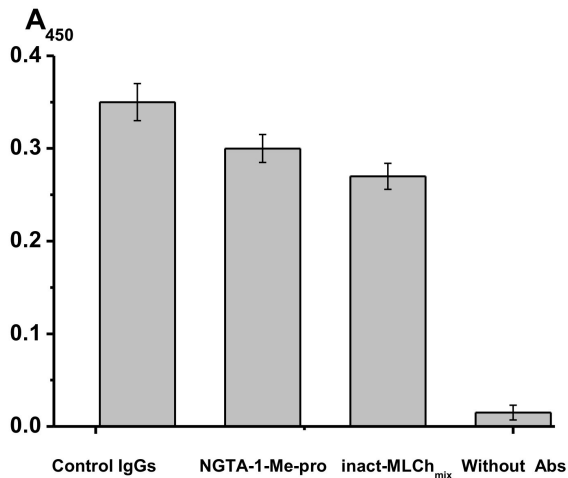

**Supplementary Fig. 1.** The interaction of the MLChs with MBP was analyzed using standard ELISA plates with immobilized MBP. The relative content of anti-MBP antibodies in the samples was expressed as the relative absorption at 450 nm. IgG preparation was used as positive control, sample without Abs was used as negative control.
