# Supplementary material for: Systemic lupus erythematosus: molecular cloning and analysis of recombinant monoclonal kappa light chain NGTA1-Me-pro with two metalloprotease active centers
Source: Royal Society of Chemistry journal article supplement (doi:10.1039/c6mb00573j), 2016-10-11
Supplement: c6mb00573j2.pdf [file c6mb00573j2.pdf]

## **A** DNA sequence of NGTA1-Me-pro

ATGCGGCCGCACATCATCATCACCCATCACGGGGCCGCAGAACAAAACTCATCTCAGAAGAGGATCATGGGGCCGCA  
TAGACTGTTGAAAGTTGTTCAAAACCTCATACAGAAAATTCATTTACTAACGTCTGAAAAGACGACAAAACTTATCG  
TTACGC TAAC TATGAGGGCTGTCTGTGGAATGCTACAGGCGTTGTGGTTTGTA CTGGTGACGAAACTCAGTGT TACG  
GTACATGGGTTCCTATTGGGCTTGCTATCCCTGAAAA TGAGGGTGTGGCTCTGAGGGTGCCGTTCTGAGGGTGGC  
GGTAAGAAAAACCGTACGGTACACCTATTCCGGGCTA TACTTATA TCAACCCCTCTC GACGGCAC TTATCCGCCTGGT  
ACGCAAAACC CCGTAAATCCTAATCC TCTCTGGAGTCTCAGCCTCTTAATAC TTT CATGTTTCAGAA TAAGTTCCG  
AAAGCAGGGTGCATTAAC TGTTTATACGGGCATGTTACTCAAGGCACTGACCCCGTTAAACTTATTA CCAGTACAC  
TCCTGTATCA TCAAAGC CATGTATGACGCTTACTGGAACGGTAAATTCAGAGACTGCGCTTTCATTCTGGCTTTA  
ATGAGGATCC CATTCCGT TTGTGAAA TTGAGGCCAA TCGTCTGACCTGCCCTCAA CCCTCTGTCAATGCTGGCGG  
CGGGCTCTGGGTGGGTGGTTTCTGGGTGGCGGC

## **B** Protein sequence of NGTA1-Me-pro

1- MRPHHITITGPQNKNSSQKRIMGPHRLLKVVQNLIQKIHLLTSGKTTKLIVTLTMRA -58  
59- VCGMLQALWFLVTKLSVTVHGFLLGLLSLKMRVVALRVAVLRVAVRKT VRY -110  
111- TYSGLYLYQPSRRHLSAWYAKPRSSFSGVSASYFHVSEVPKAGCINCLYGH - 161  
162- VTQGTDPVKTYQYTPVSSKAMYDAYWNGKFRDCAFHSGFNEDPIPFVKL -211  
212 -EANRLTCPOPSOCWRRALGGWFLGGG -238
